# Supplementary material for: Size-Pattern and Larval-Length–Mass Relationships for the Most Common Chironomid Taxa in the Deep Subalpine Lake Maggiore
Source: MDPI journal article supplement (doi:10.3390/w15152730), 2023-07-28
Supplement: s1 [file s1]

## Supplementary Materials:

# Size-Pattern and Larval-Length–Mass Relationships for the Most Common Chironomid Taxa in the Deep Subalpine Lake Maggiore

Lyudmila Kamburska <sup>\*,†</sup>, Silvia Zaupa <sup>†</sup> and Angela Boggero <sup>†</sup>

National Research Council, Water Research Institute, (CNR-IRSA), Corso Tonolli 50, 28922 Verbania, Italy; silvia.zaupa@gmail.com (S.Z.); angela.boggero@irsa.cnr.it (A.B.)

\* Correspondence: lyudmila.kamburska@irsa.cnr.it

† These authors contributed equally to this work.

## Supporting Information

**Table S1.** Inventory of sampling periods (months in Latin numbers) and sites with geographic coordinates WGS84.

| Sampling site                            | Site coordinates        | Year/month     |    |      |      |    |      |
|------------------------------------------|-------------------------|----------------|----|------|------|----|------|
|                                          |                         | 2019           |    | 2020 |      |    | 2021 |
|                                          |                         | VIII           | IX | VII  | VIII | IX | VII  |
|                                          |                         | No. replicates |    |      |      |    |      |
| <b>Magadino (M)</b>                      | 46.147427 N; 8.855947 E | 6              | 6  | 6    | 5    | 6  | 4    |
| <b>Fondo Toce (FT)</b>                   | 45.937813 N; 8.490445 E | 6              | 6  | 4    | 6    | 6  | 4    |
| <b>Sesto Calende (SC)</b>                | 45.723955 N; 8.634362 E | 6              | 6  | 6    | 5    | 6  | 6    |
| <b>Total number of samples per month</b> |                         | 18             | 18 | 16   | 16   | 18 | 14   |

**Table S2.** Number of measured and weighted individuals by taxon in alphabetic order.

\*For the abbreviation of the variables see Table 5 in the paper.

| Taxon                                      | HW  | HL  | TL  | DW  | WW |
|--------------------------------------------|-----|-----|-----|-----|----|
| <i>Ablabesmyia longistyla</i>              | 5   | 5   | 5   | 3   |    |
| <i>Chironomus</i> gr. <i>thummi</i>        | 3   | 3   | 3   |     |    |
| <i>Cladotanytarsus</i> sp.                 | 240 | 301 | 301 | 175 | 1  |
| <i>Cricotopus</i> sp.                      | 10  | 11  | 11  | 10  | 1  |
| <i>Cryptochironomus</i> sp.                | 183 | 206 | 206 | 168 | 7  |
| <i>Demicryptochironomus vulneratus</i>     | 18  | 22  | 22  | 14  | 3  |
| <i>Dicrotendipes nervosus</i>              | 2   | 3   | 3   | 3   | 1  |
| <i>Einfeldia</i> sp.                       | 2   | 2   | 2   |     |    |
| <i>Heleniella</i> sp.                      | 1   | 1   | 1   |     |    |
| <i>Heterotrissocladius marcidus</i>        | 1   | 1   | 1   |     |    |
| <i>Microchironomus tener</i>               | 2   | 4   | 4   | 2   |    |
| <i>Monodiamesa bathyphila</i>              | 15  | 19  | 19  | 14  | 6  |
| <i>Nanocladius</i> sp.                     | 6   | 6   | 6   |     |    |
| <i>Odontomesa fulva</i>                    | 1   | 1   | 1   |     |    |
| <i>Ortocladina</i> sp.                     | 2   | 2   | 2   |     |    |
| <i>Paracladopelma camptolabis</i>          | 9   | 9   | 9   | 1   |    |
| <i>Paralauterborniella nigrohalteralis</i> | 2   | 2   | 2   | 2   |    |

|                                   |            |             |             |            |            |
|-----------------------------------|------------|-------------|-------------|------------|------------|
| <i>Parametriocnemus</i> sp.       | 1          | 1           | 1           | 0          | 0          |
| <i>Paratanytarsus</i> sp.         | 2          | 2           | 2           | 1          |            |
| <i>Polypedilum bicornatum</i>     | 23         | 54          | 54          | 44         | 17         |
| <i>Polypedilum nubeculosum</i>    | 57         | 58          | 58          | 50         | 1          |
| <i>Polypedilum scalenum</i>       | 3          | 3           | 3           | 3          |            |
| <i>Procladius</i> sp.             | 4          | 8           | 8           | 8          | 1          |
| <i>Prodiamesa olivacea</i>        | 2          | 2           | 2           | 2          |            |
| <i>Psectrocladius sordidellus</i> | 54         | 56          | 56          | 42         |            |
| <i>Stictochironomus pictulus</i>  | 328        | 405         | 405         | 223        | 91         |
| <i>Tanytarsus</i> sp.             | 9          | 9           | 9           | 2          |            |
| <i>Thienemannimyia</i> gr.        | 1          | 1           | 1           |            |            |
| <b>Total</b>                      | <b>986</b> | <b>1197</b> | <b>1197</b> | <b>767</b> | <b>129</b> |
